# Supplementary material for: A sweet spot for highly efficient growth of vertically aligned single-walled carbon nanotube forests enabling their unique structures and properties
Source: Royal Society of Chemistry journal article supplement (doi:10.1039/c5nr05537g), 2015-11-26
Supplement: c5nr05537g1.pdf [file c5nr05537g1.pdf]

Electronic Supplementary Information for

## **A sweet spot for highly efficient growth of vertically aligned single-walled carbon nanotube forests enabling their unique structures and properties**

Guohai Chen,<sup>\*ab</sup> Robert C. Davis,<sup>c</sup> Don N. Futaba,<sup>\*ab</sup> Shunsuke Sakurai,<sup>ab</sup> Kazufumi Kobashi,<sup>ab</sup>  
Motoo Yumura,<sup>ab</sup> and Kenji Hata<sup>\*ab</sup>

<sup>a</sup>Technology Research Association for Single Wall Carbon Nanotubes (TASC), Central 5, 1-1-1 Higashi, Tsukuba, Ibaraki, 305-8565, Japan.

<sup>b</sup>National Institute of Advanced Industrial Science and Technology (AIST), Central 5, 1-1-1 Higashi, Tsukuba, Ibaraki, 305-8565, Japan.

<sup>c</sup>Department of Physics and Astronomy, Brigham Young University, Provo, Utah 84602, USA.

\* Corresponding Author: Guohai Chen, Kenji Hata, Don N. Futaba

E-mail: [guohaichen@gmail.com](mailto:guohaichen@gmail.com), [kenji-hata@aist.go.jp](mailto:kenji-hata@aist.go.jp), [d-futaba@aist.go.jp](mailto:d-futaba@aist.go.jp)

## **Detailed experimental processes for each catalyst preparation method and CNT synthesis process**

The detailed experimental processes are described in the following according to the different catalyst preparation methods:

**Standard Super-Growth (water-assisted) CVD:** Catalyst Fe film (~1.8 nm) was sputtered onto Si/(~40 nm) Al<sub>2</sub>O<sub>3</sub> substrate. The substrate was inserted into a 1" diameter quartz tube furnace and the temperature was raised to 750 °C in 90% H<sub>2</sub> with He as carrier gas at a total gas flow rate of 1000 sccm. Then the water vapor (~100-150 ppm) was introduced into the furnace. After ~6 min, H<sub>2</sub> gas was switched off and C<sub>2</sub>H<sub>4</sub> carbon source (~10% in He) was switched on to perform the growth for ~10 min. Once the growth was finished, the furnace was cooled down to room temperature in He.

**Aluminum-capped Fe:** ~5 nm aluminum film was sputtered onto Si/SiO<sub>2</sub> substrate, followed by an oxygen plasma treatment (3 min at 100 W). Then, catalyst Fe film (0.5-2.5 nm) and capping aluminum film (0.5-2.0 nm) were separately sputtered to form the trilayer structure. The formation phase was carried out at different formation temperatures (550-750 °C) in 90% H<sub>2</sub> with He as carrier gas at a total gas flow rate of 1000 sccm, followed by a growth phase at 750 °C with 1% C<sub>2</sub>H<sub>4</sub> in He for various durations.

**Arc plasma deposition of catalyst:** Catalyst nanoparticles were deposited in a high vacuum chamber (~4×10<sup>-4</sup> Pa) onto Si/(~40 nm) Al<sub>2</sub>O<sub>3</sub> substrates by arc plasma deposition. Voltage, determining arc current, was increased to increase nanoparticle size and ranged from 80–180 V at a fixed capacitance of 720 μF. The density of deposited nanoparticles was determined by the number of arc pulses, which ranged from 100 to 170. The substrate was inserted into a preheated CVD system at 750 °C to reduce the metallic nanoparticles (90% H<sub>2</sub> in He at a total flow rate of 1000 sccm) for 1 min, immediately followed by a growth phase for 6 min using 1% C<sub>2</sub>H<sub>4</sub> as the carbon source and He as the carrier gas at 1000 sccm total flow rate.

**Fe film thickness (1.8-5 nm):** Fe thin films with thicknesses of 1.8-5.5 nm were sputtered onto Si/(~40 nm) Al<sub>2</sub>O<sub>3</sub> substrates. The catalysts was inserted into a 3" furnace and the temperature was increased to ~800 °C in H<sub>2</sub>/He (90%/10%) ambient. CNTs were synthesized with a diluted

$\text{C}_2\text{H}_2$  (10%  $\text{C}_2\text{H}_2$  in He) as carbon source at  $\sim 800^\circ\text{C}$  with optimized  $\text{C}_2\text{H}_2$  of 30–60 sccm and water vapor concentration of 100–270 ppm for  $\sim 10$  min.

**Thin Fe film (0.9-1.8 nm):** Fe thin films with thicknesses of 0.9-1.8 nm were sputtered onto Si/ $(\sim 40\text{ nm})$   $\text{Al}_2\text{O}_3$  substrates. The substrates were inserted into a 1" furnace preheated at  $750^\circ\text{C}$  for  $\sim 6$  min in  $\text{H}_2/\text{He}$  (90%/10%) ambient and followed another  $\sim 6$  min with introducing water vapor of  $\sim 100$ -200 ppm. CNTs were synthesized with  $\text{C}_2\text{H}_4$  (70 sccm) as carbon source, He as carrier gas and water vapor of  $\sim 100$ –200 ppm for  $\sim 10$  min at a total gas flow rate of 1000 sccm.

**$\text{FeCl}_3$  catalyst by wet chemistry:**  $\text{FeCl}_3$  (iron chloride) was dissolved into organic solvents and coated onto Si/ $(\sim 40\text{ nm})$   $\text{Al}_2\text{O}_3$  substrate to form the catalyst. The catalyst was introduced into the furnace and exposed to  $\text{H}_2/\text{He}$  (40%/60%) ambient at  $750^\circ\text{C}$ . Subsequently, CNTs were synthesized by water-assisted CVD with  $\text{C}_2\text{H}_4$  (10%) and water vapor of 100–150 ppm at  $750^\circ\text{C}$  for 10 min.

**Total gas flow (500-4000 sccm) & Annealing temperature (500-950  $^\circ\text{C}$ ):** Fe catalyst (1.5 nm) was sputtered onto Si/ $(\sim 30\text{ nm})$   $\text{Al}_2\text{O}_3$  substrate. The substrate was inserted into the furnace and exposed to  $\text{H}_2$  with different flow rates (total gas flow rate: 500-4000 sccm) and  $\text{H}_2$  concentrations (10-90% with He as carrier gas) and ramped to the annealing temperature (in the range of 500-950  $^\circ\text{C}$ ) in 15 min and ramped within an additional 3 minutes to the fixed growth temperature of  $840^\circ\text{C}$ . Water-assisted CVD was carried out immediately at a fixed growth condition (50 sccm  $\text{C}_2\text{H}_4$ , 950 sccm He, and  $\sim 100$  ppm water for 10 min at  $840^\circ\text{C}$ ).

**Annealing time (1-11 min):** Fe catalyst ( $\sim 1.8\text{ nm}$ ) was sputtered onto Si/ $(\sim 40\text{ nm})$   $\text{Al}_2\text{O}_3$  substrate. The catalyst was inserted into a 1" furnace preheated at  $750^\circ\text{C}$  and annealed for  $\sim 1$ -11 min in  $\text{H}_2/\text{He}$  (40%/60%) ambient. CNTs were synthesized using Super-Growth CVD with 70 sccm  $\text{C}_2\text{H}_4$  as carbon source and He as carrier gas for 10 min.

**Annealing time (1-30 min) for thin Fe film:** Thin Fe catalysts ( $\sim 0.9$ -1.2 nm) were sputtered onto Si/ $(\sim 40\text{ nm})$   $\text{Al}_2\text{O}_3$  substrate. The catalysts were inserted into a 1" furnace preheated at  $750^\circ\text{C}$  and annealed for  $\sim 1$ -30 min in  $\text{H}_2/\text{He}$  (40%/60%) ambient with water vapor of  $\sim 200$ -300 ppm. CNTs were synthesized using Super-Growth CVD with 70 sccm  $\text{C}_2\text{H}_4$  as carbon source and He as carrier gas for 10 min.

**Annealing temperature (750-900 °C) for thin Fe film:** Thin Fe catalysts (~1.2-1.8 nm) were sputtered onto Si/(~40 nm) Al<sub>2</sub>O<sub>3</sub> substrate. The catalysts were inserted into a 1" furnace preheated at 750-900 °C and annealed for ~6 min in H<sub>2</sub>/He (40%/60%) ambient. CNTs were synthesized using Super-Growth CVD with 70 sccm C<sub>2</sub>H<sub>4</sub> as carbon source and He as carrier gas for 10 min.

**Adding H<sub>2</sub>O during annealing (4.5-18%):** Fe catalyst (~1.8 nm) was sputtered onto Si/(~40 nm) Al<sub>2</sub>O<sub>3</sub> substrate. The catalyst was inserted into a 1" furnace preheated at 750 °C and annealed for ~6 min in H<sub>2</sub>/He (40%/60%) ambient with various water vapor concentrations (He (with water vapor) gas flow rate: 45-180 sccm, real water vapor concentration was ~300-1200 ppm). CNTs were synthesized using Super-Growth CVD with 70 sccm C<sub>2</sub>H<sub>4</sub> as carbon source and He as carrier gas for 10 min.

**Air exposure time (6-60 sec):** Fe catalyst (~1.6 nm) was sputtered onto Si/(~40 nm) Al<sub>2</sub>O<sub>3</sub> substrate. The catalyst was inserted into a 1" furnace preheated at 75 °C and annealed for ~6 min in H<sub>2</sub>/He (90%/10%) ambient. Then the catalysts were taken out and exposed to an ambient environment for 6-60 sec. A growth stage was immediately carried out using Super-Growth CVD with 75 sccm C<sub>2</sub>H<sub>4</sub> as carbon source, He as carrier gas, and ~75 ppm water vapor for 9-12 min.

**Reactive ion etching (10-35 W, 5-35 min):** Fe catalyst (~1.6 nm) was sputtered onto Si/(~40 nm) Al<sub>2</sub>O<sub>3</sub> substrate and then treated by reactive ion etching under various conditions (10-35 W, 5-35 min). The treated catalyst was inserted into the furnace preheated at 750 and annealed for ~6 min in H<sub>2</sub>/He (90%/10%) ambient. CNTs were synthesized using Super-Growth CVD with 75 sccm C<sub>2</sub>H<sub>4</sub> as carbon source, He as carrier gas, and ~75 ppm water vapor for 10-13 min.
